# Supplementary material
Source: Springer Nature journal article supplement (https://www.springermedizin.de/resource/supplementary/12947_2009_304_MOESM7_ESM.pdf/9556658)

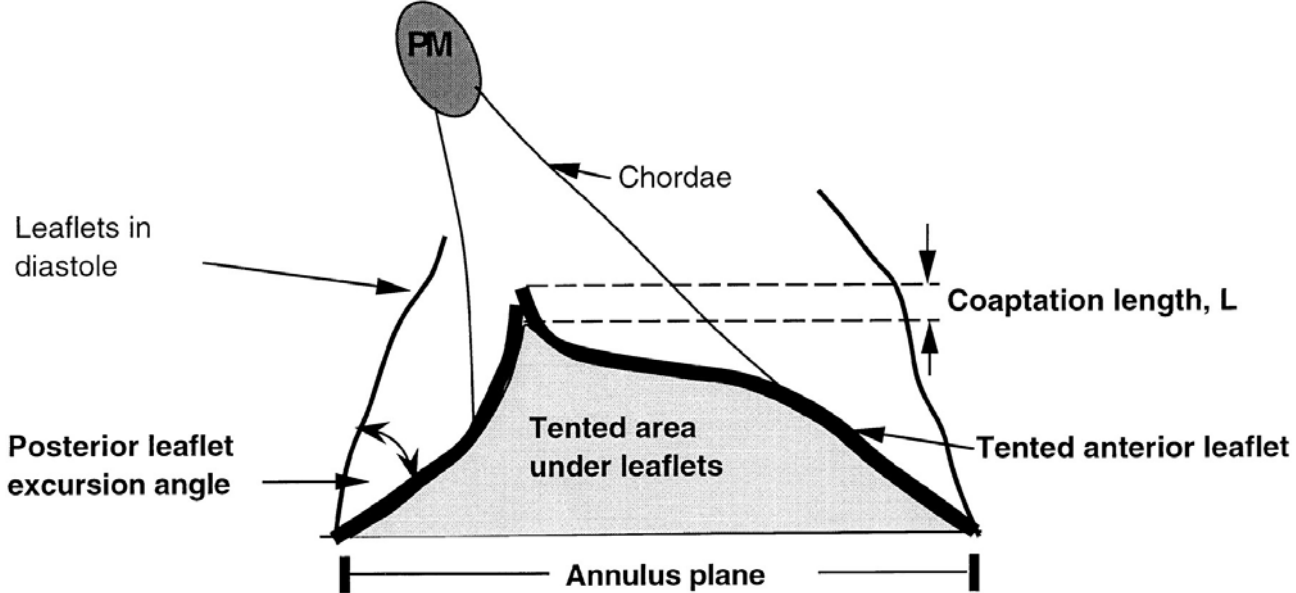

Supplement: MOESM7 [file 9556658]
